# Supplementary material
Source: PubMed Central journal article supplement (PMC6219754)
Supplement: NIHMS848864-supplement-2.pdf [file NIHMS848864-supplement-2.pdf]

Alt. Allele Freq. on EUR Non-Introgressed Haplotypes

Before Freq. Filtering (n = 5674)

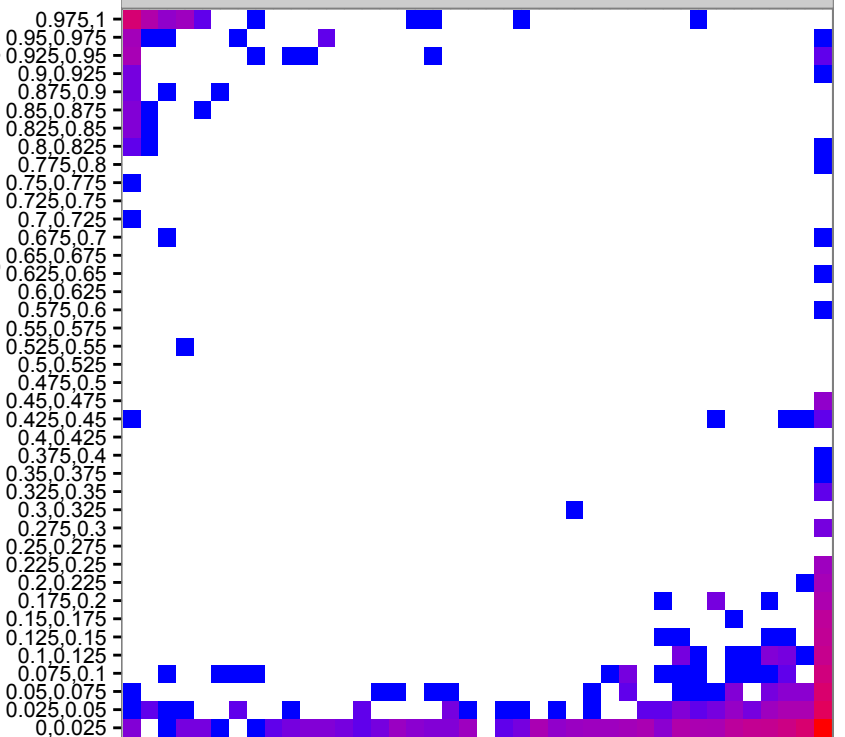

After Freq. filtering (n = 5055)

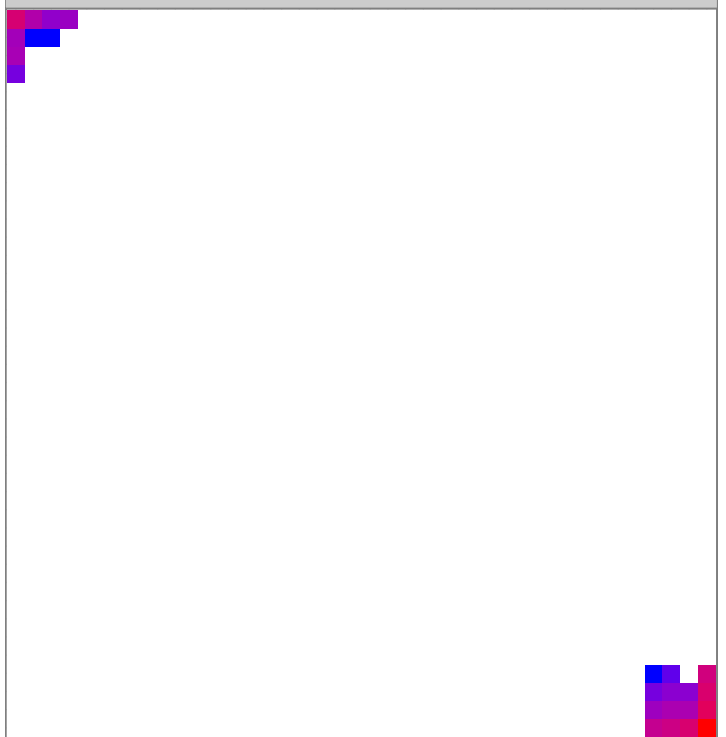

count

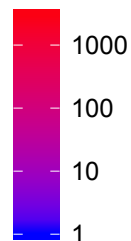

Alt. Allele Freq. on EUR Introgressed Haplotypes
