# Supplementary material
Source: PubMed Central journal article supplement (PMC6219754)
Supplement: NIHMS848864-supplement-9.pdf [file NIHMS848864-supplement-9.pdf]

683 **TABLES**  
684

| Tag SNP    | $\hat{\beta}_0$ | ASE <i>P</i>          | Gene Symbol     | GWAS <i>P</i>                              | Phenotype                                     |
|------------|-----------------|-----------------------|-----------------|--------------------------------------------|-----------------------------------------------|
| rs950169   | -0.413          | $< 1 \times 10^{-10}$ | <i>ADAMTSL3</i> | $6 \times 10^{-23}$<br>$2 \times 10^{-11}$ | height<br>schizophrenia                       |
| rs72705102 | -0.813          | $< 1 \times 10^{-10}$ | <i>CEP72</i>    | $4 \times 10^{-11}$                        | cystic fibrosis lung function                 |
| rs3765107  | -0.428          | $< 1 \times 10^{-10}$ | <i>SLC15A4</i>  | $2 \times 10^{-11}$                        | systemic lupus erythematosus                  |
| rs5744258  | 0.474           | $1.89 \times 10^{-9}$ | <i>IL18</i>     | $1 \times 10^{-8}$                         | IL18 levels                                   |
| rs61854810 | -1.504          | 0.00264               |                 | $2 \times 10^{-10}$                        | optic disc size                               |
| rs2235371  | -0.146          | 0.0127                | <i>IRF6</i>     | $1 \times 10^{-14}$                        | cleft lip                                     |
| rs10418340 | -0.103          | 0.0212                | <i>CEP89</i>    | $5 \times 10^{-11}$                        | serum creatinine levels                       |
| rs35370743 | -0.120          | $7.17 \times 10^{-6}$ | <i>INTS12</i>   | $1 \times 10^{-16}$                        | pulmonary function (interaction with smoking) |

685  
686 **Table 1. Neanderthal-introgressed haplotypes are associated with modern human**  
687 **phenotypes.** Negative values of  $\hat{\beta}_0$  indicate downregulation of Neanderthal alleles,  
688 while positive values indicate upregulation.

689  
690  
691 **SUPPLEMENTAL FIGURE LEGENDS**

692 **Figure S1. Minor allele frequencies of expressed Neanderthal-introgressed**  
693 **haplotype-tagging SNPs on and off of called introgressed haplotypes. Related to**  
694 **STAR Methods.** SNPs defining significant *S\** Neanderthal haplotypes and matching the  
695 Altai Neanderthal allele were further filtered based on the criteria that the Neanderthal  
696 allele be observed at >90% frequency on Neanderthal haplotypes and <10% frequency  
697 off of these haplotypes or vice versa (European samples in the 1000 Genomes Project  
698 Phase 3 dataset).

699 **Figure S2. Proportion of Neanderthal SNPs with significant ASE as a function of**  
700 **FDR threshold. Related to Figure 2.** The gray dashed line indicates the  $FDR \leq 10\%$   
701 threshold.

702 **Figure S3. Enrichment of SNPs showing significant ASE for directionally-**  
703 **concordant single-tissue eQTL. Related to STAR Methods.** Error bars indicate 95%  
704 confidence intervals. Blue points indicate introgressed SNPs, while green points  
705 indicate non-introgressed SNPs. Enrichment was evaluated within 5% European minor  
706 allele frequency bins using a 2 x 2 Fisher's Exact Test, comparing tested SNPs with  
707 significant ASE to tested SNPs without significant ASE.

708 **Figure S4. Model estimates of the proportion of reads supporting the Neanderthal**  
709 **allele per tissue, subsetting data into relevant groups. Related to Figure 5.** Error  
710 bars indicate 95% confidence intervals. (a) The full dataset of introgressed SNPs,  
711 equivalent to figure 5a. This panel sets the order for the remaining panels. (b) Rare

712 introgressed variants with European derived allele frequency less than or equal to 5%.  
713 (c) Common introgressed variants with European derived allele frequency greater than  
714 5%. (d) The subset of introgressed SNPs that show significant single-tissue eQTL  
715 effects for the same gene based on published GTEx data.

716 **Figure S5. Model estimates of the proportion of reads supporting the Neanderthal**  
717 **allele per tissue. Related to Figure 5.** Analogous to Fig. 5a, but including  
718 Neanderthal-modern human sequence divergence per gene as a covariate in the  
719 GLMM.

720 **Figure S6. Per-tissue rate of modern human-Neanderthal sequence divergence.**  
721 **Related to Figure 5.** Error bars indicate 2.5% and 97.5% empirical quantiles of  
722 bootstrap distributions.

723 **Figure S7. Proportions of significantly up- and downregulated SNPs per tissue.**  
724 **Related to Figure 5.** One SNP is sampled per gene to account for correlation among  
725 linked SNPs. Brain and testis tissues are enriched for downregulated compared to  
726 upregulated SNPs.

727

728

## 729 **STAR METHODS**

730

### 731 **Contact for Reagent and Resource Sharing**

732 Further information and requests for resources should be directed to and will be  
733 fulfilled by the Lead Contact, Joshua Akey (akeyj@uw.edu).

734

### 735 **Experimental Model and Subject Details**

736 All analyses were performed using published RNA-seq data obtained from GTEx  
737 Consortium (v6; phs000424.v6.p1), which derive from 53 tissues from 544 deceased  
738 individuals, 449 of whom were also genotyped to facilitate eQTL analysis. Information  
739 about the donors (gender, ethnicity, age, cause of death) can be found at  
740 <http://www.gtexportal.org/home/tissueSummaryPage#donorInfo>. The donor enrollment,
