# Supplementary material
Source: PubMed Central journal article supplement (PMC6219754)

Prop. SNPs with Sig. ASE

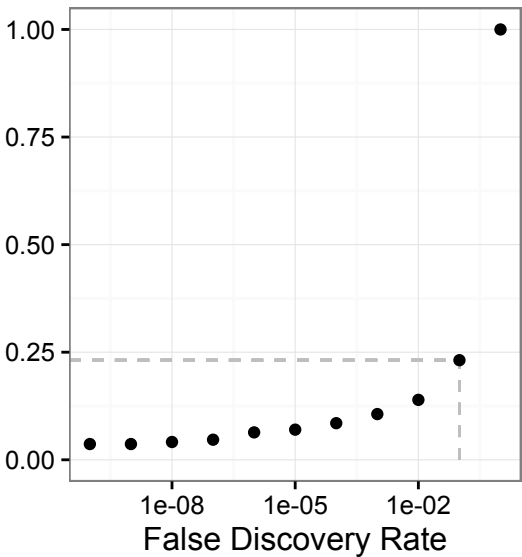

Supplement: NIHMS848864-supplement-3.pdf [file NIHMS848864-supplement-3.pdf]

eQTL Overlap Odds Ratio

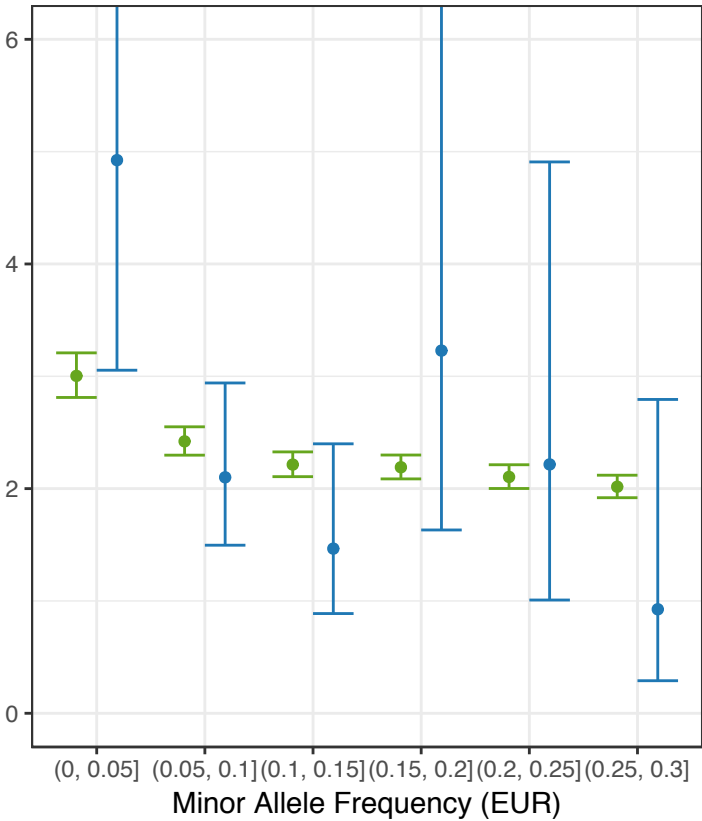

Supplement: NIHMS848864-supplement-4.pdf [file NIHMS848864-supplement-4.pdf]

Prop. Reads Supporting Neand. Allele (99% CI)

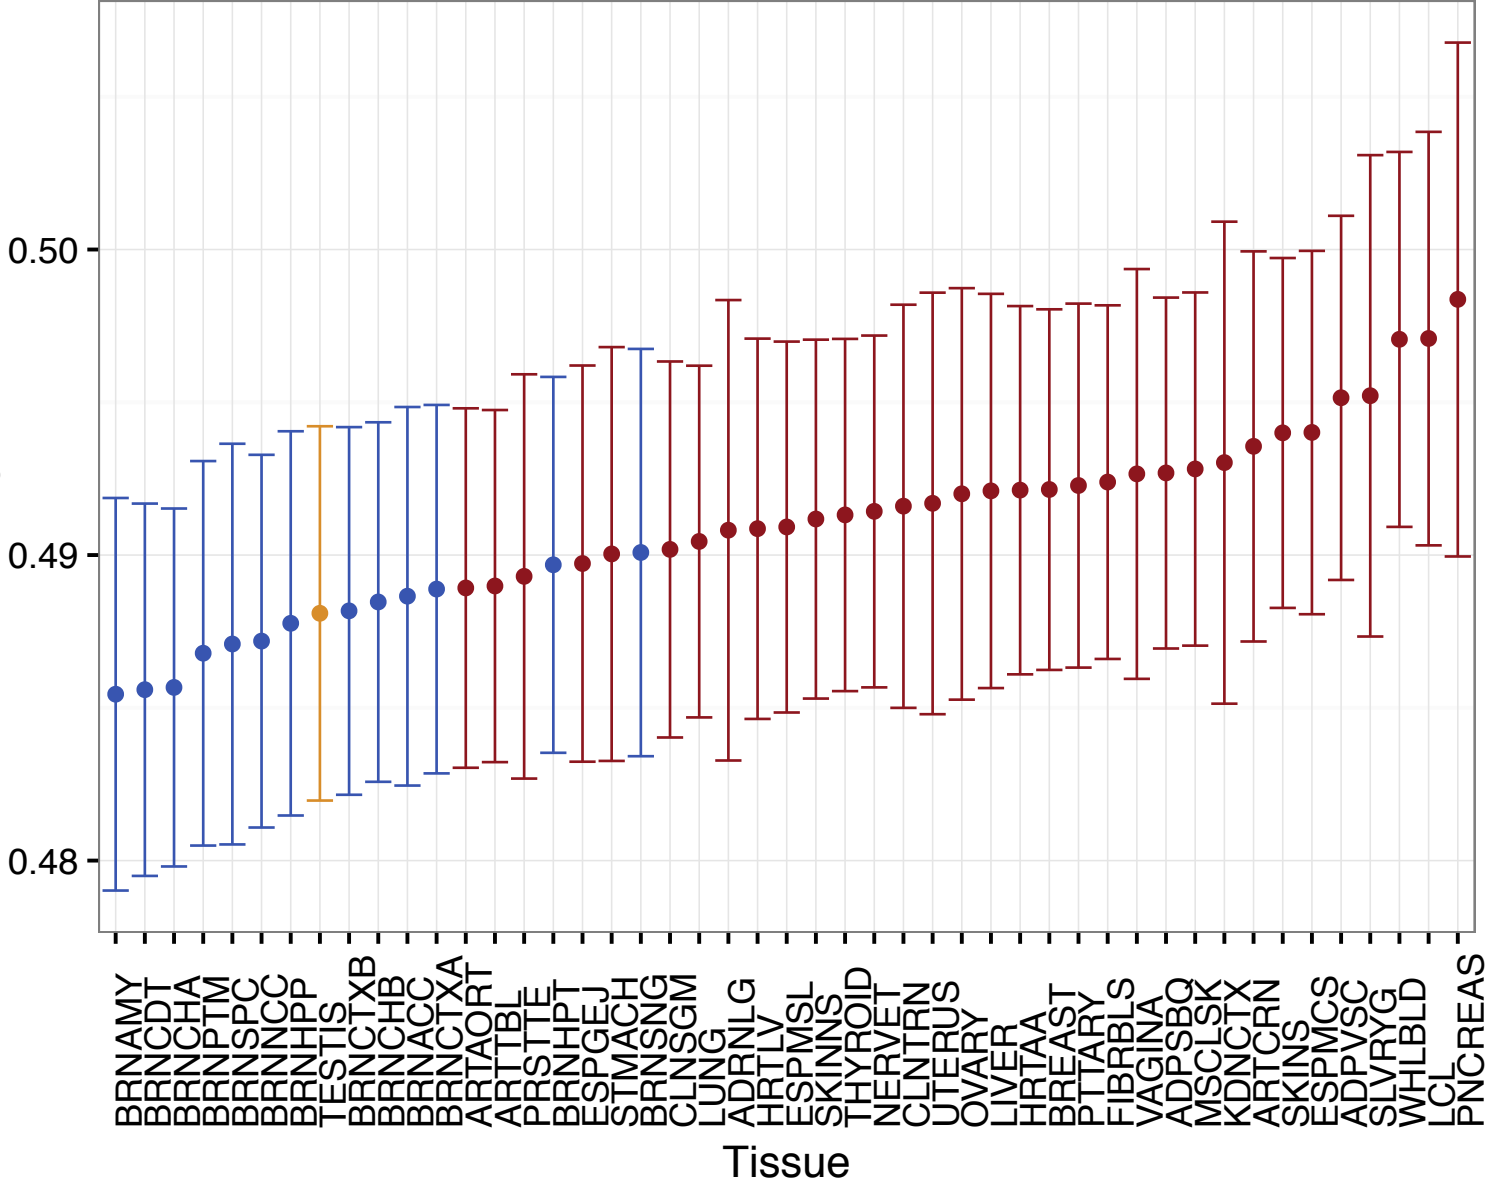

Supplement: NIHMS848864-supplement-6.pdf [file NIHMS848864-supplement-6.pdf]
